# Supplementary material for: Identification of Cross Talk between FoxM1 and RASSF1A as a Therapeutic Target of Colon Cancer
Source: PubMed Central journal article supplement (PMC6406751; doi:10.3390/cancers11020199), 2019-02-08
Supplement: cancers-11-00199-s001.pdf [file cancers-11-00199-s001.pdf]

## Identification of Cross Talk between FoxM1 and RASSF1A as a Therapeutic Target of Colon Cancer

Thomas G. Blanchard, Steven J. Czinn, Vivekjiyoti Banerjee, Neha Sharda, Andrea C. Bafford, Fahad Mubariz, Dennis Morozov, Antonino Passaniti, Hafiz Ahmed and Aditi Banerjee

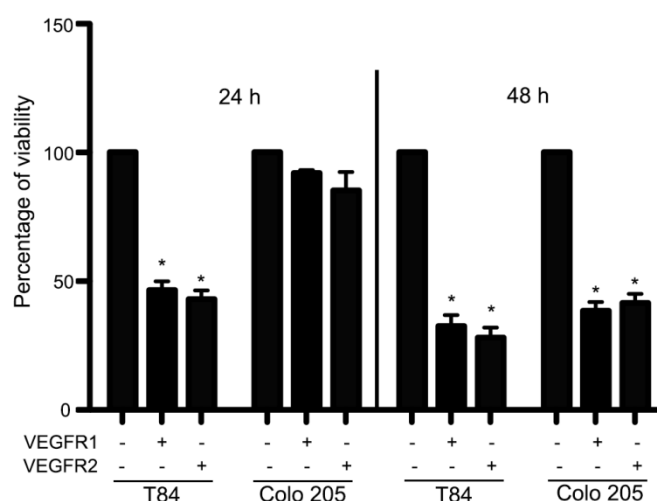

**Figure S1.** Neutralization level of VEGFR1 and VEGFR2.

**Table S1.** qRT-PCR Primers.

| Gene   | Primer Sequence Forward      | Primer Sequence Reverse        |
|--------|------------------------------|--------------------------------|
| MXI1   | 5'-GGAAAAGAATCGACGAGCTCAT-3' | 5'-GGGTGCAGTCTGGTCCTAGTG-3'    |
| POLR2A | 5'-GCATGGCAGAGGAGTTTCGGCT-3' | 5'-ATTTCCCCGGGATGCGCAATGG-3'   |
| E2F6   | 5'-AGAGCTTTTCTCATGGACACA-3'  | 5'-CGAGACCCCATCAACGTG-3'       |
| EZH2   | 5'-GCCAGACTGGAAGAAATCTG-3'   | 5'-TGTGCTGGAAAATCCAAGTCA-3'    |
| ZNF687 | 5'-ATGTCTGTCCTGAGTGTGGG-3'   | 5'-TTGTGGAAAACCTCGCAGTG-3'     |
| NR2F1  | 5'-CAGCGGTGCAAACCATGTGC-3'   | 5'-GCAAGTTGGCTGAACCAAATG-3'    |
| MNT    | 5'-GGTGGCCCTTGTTTACAGTG-3'   | 5'-TGGAGCATGAACAGCCACTA-3'     |
| GABPA  | 5'-TTGGCAAGTCAAGAACAACAGA-3' | 5'-GCGCTCTTTGTACTTTGGCT-3'     |
| TARDBP | 5'-GCTGATGGGCTGAGAACATG-3'   | 5'-GGACACAGAACTGCAGCAAA-3'     |
| ZFX    | 5'-GCCAGTCCACAGCAAGAAC-3'    | 5'-TTGGTATCCGAGAAAAGTCAGAAG-3' |
| REST   | 5'-AGCTGCTGTGATTACCTGGT-3'   | 5'-ACAGGCTGAGGTTCTACGAC-3'     |
| ZNF592 | 5'-ACAGCCATCCTAGCAACAGT-3'   | 5'-AGAGATCCTTTGTGTGGCCA-3'     |
